# Supplementary material
Source: MDPI journal article supplement (https://www.mdpi.com/2304-6740/5/4/87)
Supplement: s1 [file s1]

# Supplementary Materials: The Mechanism of Rh-catalyzed Transformation of Fatty Acids to Linear Alpha Olefins.

Sondre H. Hopen Eliasson, Anamitra Chatterjee, Giovanni Occhipinti and Vidar R. Jensen

## 1. Rh reaction pathways

To find the most favored pathway for the Rh catalyzed decarbonylative dehydration many different possibilities, presented in the following, were explored. The free energy of the most favorable route(s) is colored in green, while energies of highly unfavorable species and pathways are colored in red. Other energies have been given a blue tint. The pathway reported in the manuscript corresponds to the pathway labeled “a” in the following. Except where otherwise indicated, all reported energies are Gibbs free energies calculated at 523 K, with butanoic acid as continuum solvent (termed  $\Delta G_{BA}$ ). The values in parentheses are the energies calculated using a CO pressure of  $10^{-5}$  atm as described in the Computational Method section.

### a) Oxidative addition.

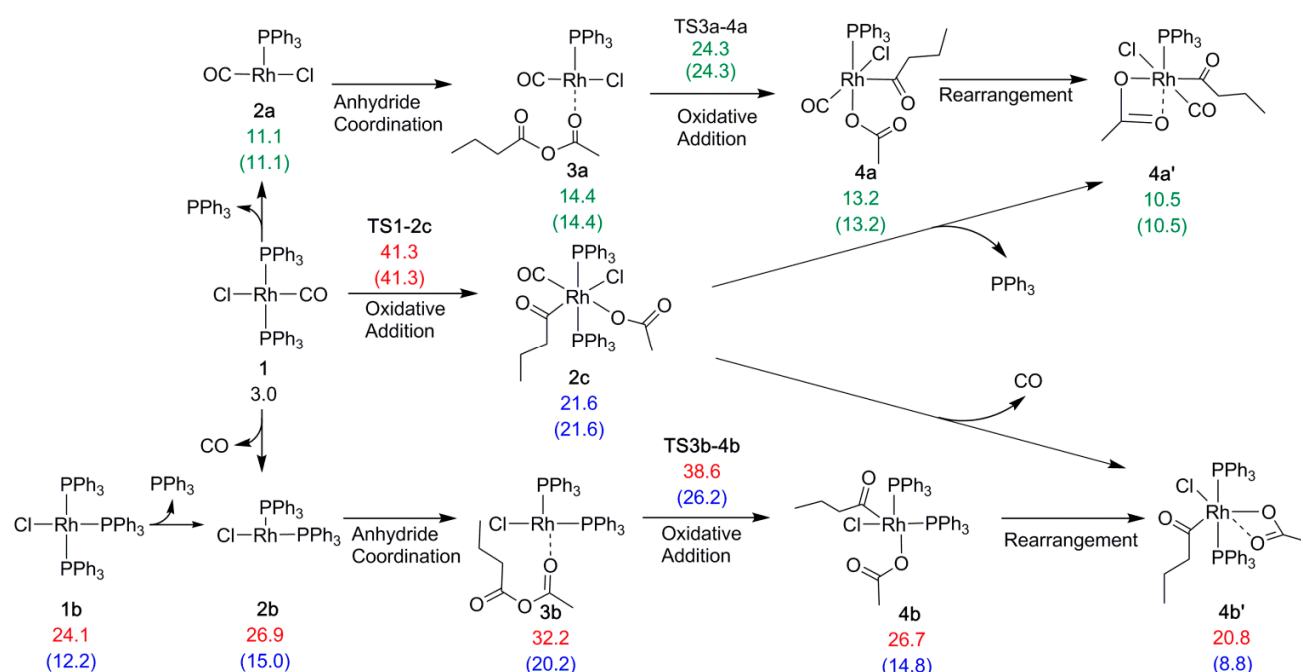

**Scheme S1.** The investigated pathways for oxidative addition of mixed anhydride.

b) Decarbonylation.

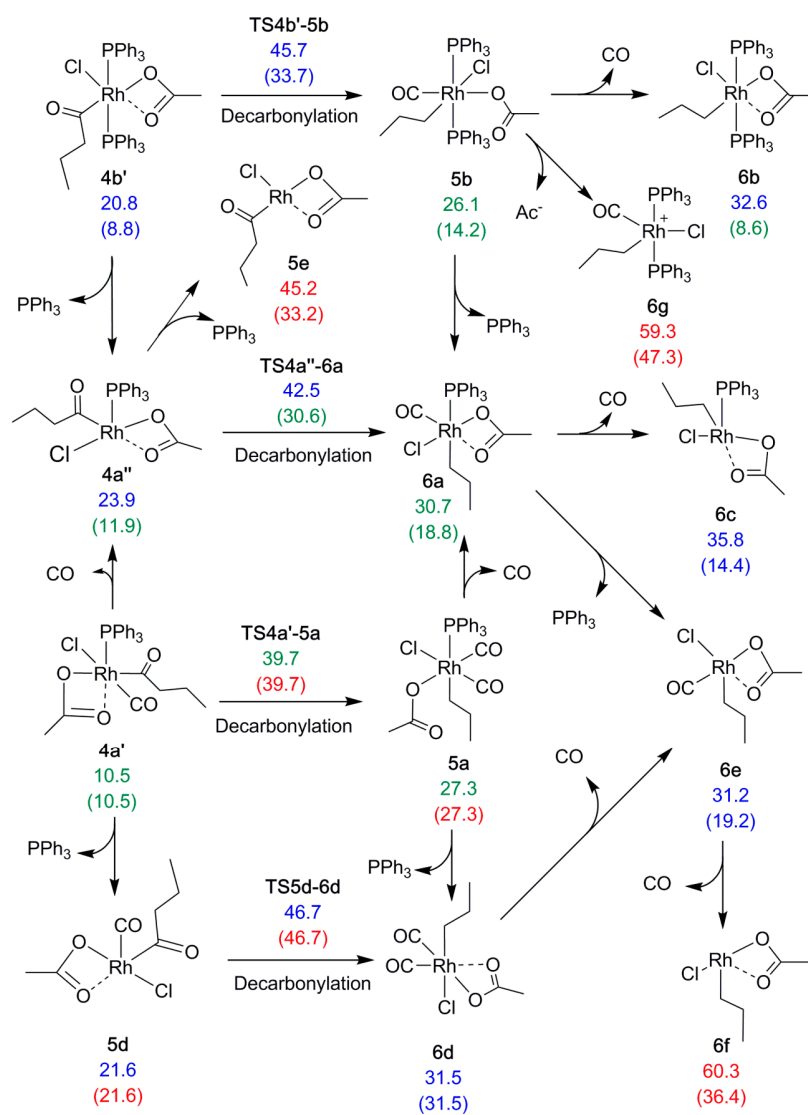

**Scheme S2.** The investigated pathways for decarbonylation.

c) Alkene formation.

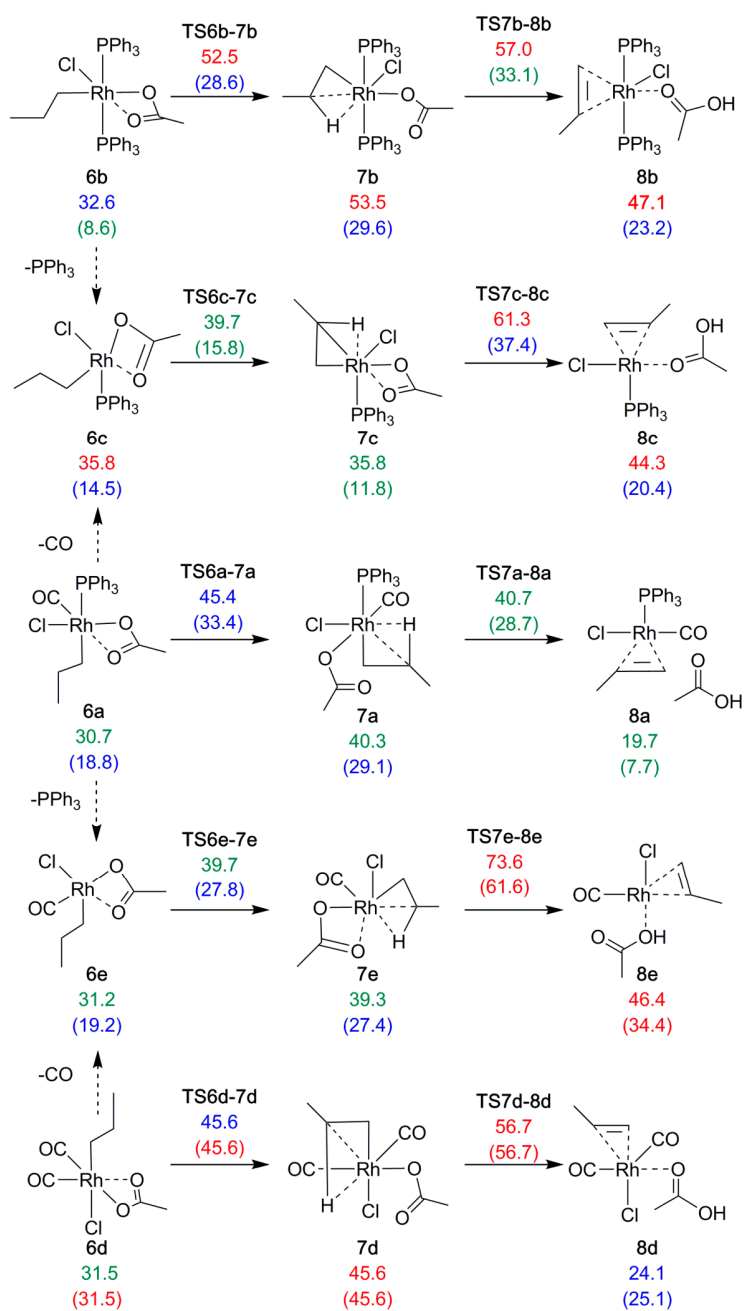

**Scheme S3.** The investigated pathways for  $\beta$ -hydrogen transfer to form alkene.

## 2. The energy profile for the Rh-Mechanism in gas phase and butanoic acid and 4-heptanone solvent.

The decarbonylative dehydration reactions are typically carried out in neat substrates and anhydride additives, i.e., without solvent. In other words, the reaction environment is dominated by the substrate and the additive (here: butanoic acid and acetic anhydride, respectively) and the acetic acid produced by the reaction. We have modeled this environment by using two solvents with different dielectric constants, butanoic acid (BA,  $\epsilon = 2.85$ ) and 4-heptanone (4-Hep,  $\epsilon = 12.26$ ), respectively, for which parameters are available in Gaussian 09. The corresponding free energy profiles of Rh-catalyzed decarbonylative dehydration in Scheme S4 are quite similar, with slightly higher barriers in general for the reaction modeled in 4-heptanone.

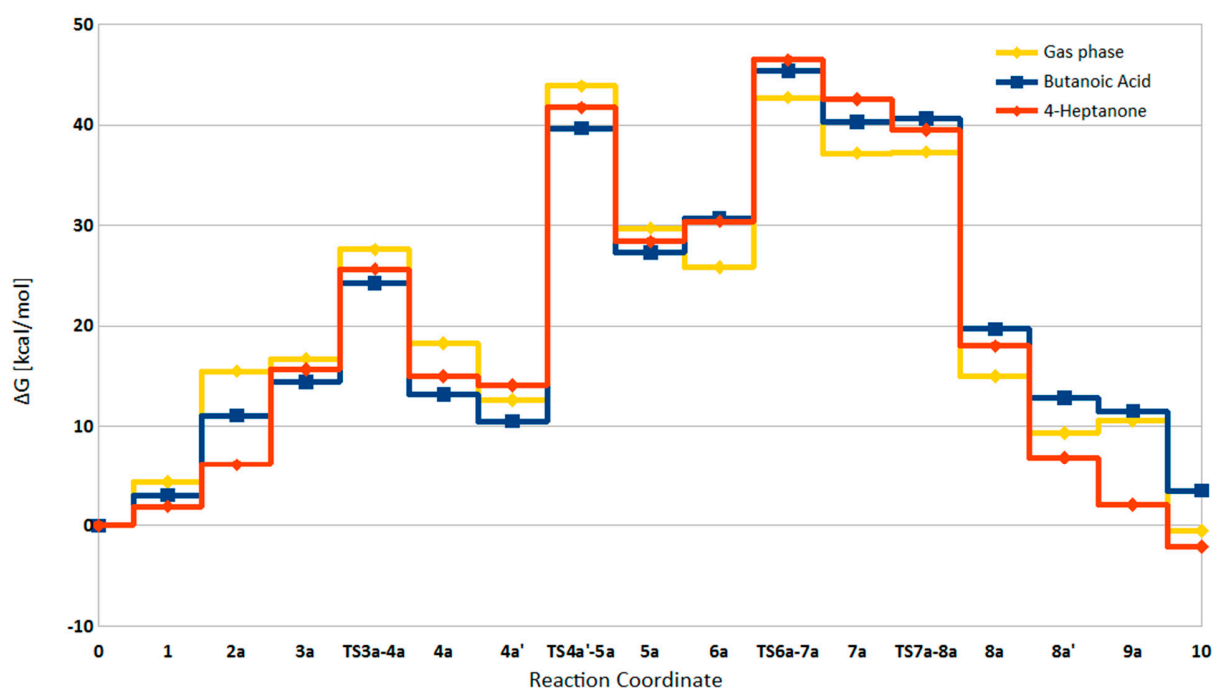

**Scheme S4.** The free energy profile for Rh-catalyzed decarbonylative dehydration as calculated in gas phase, butanoic acid (SMD model) and 4-heptanone solvent (SMD model) using the M06L functional and QZ basis sets.

### 3. The free energies for the reaction using different functionals and modified BJ-dampening.

SP calculations were performed using different DFT functionals (see the Computational Method section) to investigate the influence on the  $\Delta G_{BA}$  for species of pathway **a**. The functionals investigated were PBE [1,2], B3LYP [3] and M06L [4-6]. PBE was used in combination Grimme's empirical dispersion term D3 in combination with Becke-Johnson damping [7], using both the original (termed D3-BJ) and the modified [8] (termed D3-(M)BJ) parameters. B3LYP was used in combination with D3-(M)BJ. The functionals were found to reproduce similar trends, but with some differences. M06L gave the overall lowest barrier for the rate-determining step, but gave, together with B3LYP, a higher decarbonylation barrier compared to the PBE functional. For the oxidative addition, B3LYP was the outlier. The effect of the modified damping parameters was limited as PBE-D3(M)BJ and PBE-D3BJ in general gave energies in close agreement.

**Table S1.** The Gibbs free energies (kcal/mol) of the main species in butanoic acid solvent (SMD-model) at 523 K, calculated using different DFT functionals.

| Species       | PBE-D3BJ | B3LYP-D3(M)BJ | M06L | PBE-D3(M)BJ |
|---------------|----------|---------------|------|-------------|
| <b>0</b>      | 0.0      | 0.0           | 0.0  | 0.0         |
| <b>1</b>      | 2.8      | 2.7           | 3.0  | 2.8         |
| <b>2</b>      | 16.6     | 19.7          | 11.1 | 21.1        |
| <b>3</b>      | 21.4     | 21.5          | 14.4 | 24.1        |
| <b>TS3-4</b>  | 22.2     | 28.5          | 24.3 | 23.4        |
| <b>4'</b>     | 9.9      | 14.6          | 10.5 | 10.3        |
| <b>TS4'-5</b> | 34.3     | 41.6          | 39.7 | 34.8        |
| <b>5</b>      | 22.9     | 28.1          | 27.3 | 20.9        |
| <b>6</b>      | 34.4     | 33.6          | 30.7 | 36.7        |
| <b>TS6-7</b>  | 49.5     | 47.5          | 45.4 | 51.4        |
| <b>7</b>      | 43.4     | 42.1          | 40.3 | 45.0        |
| <b>TS7-8</b>  | 39.3     | 41.3          | 40.7 | 40.3        |
| <b>8</b>      | 24.6     | 21.8          | 19.7 | 27.0        |
| <b>8'</b>     | 18.9     | 16.9          | 12.8 | 21.7        |
| <b>9</b>      | 21.5     | 17.6          | 11.5 | 26.6        |
| <b>10</b>     | 7.6      | 0.6           | 3.5  | 8.3         |

#### 4. Energies of all species

**Table S2.** The electronic energy and free energy in a.u. calculated for the solvents (SMD-model), butanoic acid (BA) and 4-heptanone (4-Hep), and in gas phase. Calculations were performed with the M06L functional with QZ basis sets. Free energy calculated at 523 K.

| Species           | E(Gas Phase) | E(BA)        | E(4-Hep)     | G(Gas Phase) | G(BA)        | G(4-Hep)     |
|-------------------|--------------|--------------|--------------|--------------|--------------|--------------|
| MA                | -460.5042843 | -460.5029881 | -460.5176    | -460.4172857 | -460.4159896 | -460.4306015 |
| PPh <sub>3</sub>  | -1036.501858 | -1036.507937 | -1036.519006 | -1036.312966 | -1036.319045 | -1036.330114 |
| CO                | -113.3485452 | -113.3359949 | -113.3444143 | -113.3802592 | -113.3677089 | -113.3761283 |
| BA                | -307.8115738 | -307.8135656 | -307.8222835 | -307.7485168 | -307.7505086 | -307.7592264 |
| Propene           | -117.9395724 | -117.9397813 | -117.942485  | -117.9030978 | -117.9033067 | -117.9060103 |
| AcOH              | -229.1567229 | -229.1592332 | -229.169882  | -229.141733  | -229.1442433 | -229.1548921 |
| Ac <sub>2</sub> O | -381.856609  | -381.8537243 | -381.8684754 | -381.817451  | -381.8145662 | -381.8293174 |
| AcO <sup>-</sup>  | -228.5923073 | -228.6589378 | -228.6798309 | -228.5906698 | -228.6573003 | -228.6781934 |
| 1                 | -2757.071683 | -2757.082413 | -2757.111887 | -2756.660443 | -2756.671173 | -2756.700647 |
| 2a                | -1720.511493 | -1720.521085 | -1720.545596 | -1720.329746 | -1720.339338 | -1720.36385  |
| 3a                | -2181.051202 | -2181.056167 | -2181.085301 | -2180.745081 | -2180.750046 | -2180.779180 |
| TS3a-4a           | -2181.035992 | -2181.042545 | -2181.071544 | -2180.727743 | -2180.734296 | -2180.763295 |
| 4a                | -2181.0467   | -2181.05611  | -2181.084476 | -2180.742573 | -2180.751982 | -2180.780348 |
| 4a'               | -2181.056956 | -2181.061485 | -2181.087053 | -2180.751684 | -2180.756212 | -2180.781781 |
| TS4'a-5a          | -2181.007812 | -2181.015746 | -2181.043721 | -2180.7018   | -2180.709733 | -2180.737709 |
| 5a                | -2181.028852 | -2181.033958 | -2181.063446 | -2180.724359 | -2180.729466 | -2180.758954 |
| 4a''              | -2067.651966 | -2067.668488 | -2067.688056 | -2067.350697 | -2067.367219 | -2067.386787 |
| TS4a''-6a         | -2067.630565 | -2067.639393 | -2067.661559 | -2067.328615 | -2067.337444 | -2067.35961  |
| 6a                | -2067.651191 | -2067.657121 | -2067.680477 | -2067.350328 | -2067.356258 | -2067.379614 |
| TS6a-7a           | -2067.624228 | -2067.633807 | -2067.654854 | -2067.323375 | -2067.332955 | -2067.354001 |
| 7a                | -2067.632795 | -2067.641596 | -2067.66078  | -2067.332211 | -2067.341012 | -2067.360196 |
| TS7a-7a'          | -2067.628549 | -2067.637953 | -2067.66078  | -2067.329807 | -2067.339211 | -2067.362038 |
| 7a'               | -2067.64211  | -2067.650802 | -2067.673704 | -2067.343445 | -2067.352138 | -2067.375039 |
| TS7a'-8a          | -2067.630298 | -2067.6386   | -2067.663347 | -2067.3326   | -2067.340902 | -2067.365648 |
| TS7a-8a           | -2067.630312 | -2067.638721 | -2067.663364 | -2067.332023 | -2067.340432 | -2067.365075 |
| 8a                | -2067.664733 | -2067.671059 | -2067.696565 | -2067.367568 | -2067.373894 | -2067.3994   |
| 8a'               | -1838.487015 | -1838.492787 | -1838.514414 | -1838.234822 | -1838.240593 | -1838.26222  |
| 1b                | -3680.210544 | -3680.231629 | -3680.260911 | -3679.56783  | -3679.588915 | -3679.618197 |
| 2b                | -2643.652908 | -2643.675346 | -2643.700997 | -2643.242964 | -2643.265402 | -2643.291053 |
| 3b                | -3104.191897 | -3104.208899 | -3104.235654 | -3103.656039 | -3103.673040 | -3103.699795 |
| TS3b-4b           | -3104.181405 | -3104.199876 | -3104.225731 | -3103.644238 | -3103.662710 | -3103.688564 |
| 4b                | -3104.197519 | -3104.217673 | -3104.225731 | -3103.661546 | -3103.681701 | -3103.689758 |
| 4b'               | -3104.209859 | -3104.227847 | -3104.252933 | -3103.673211 | -3103.691199 | -3103.716285 |
| TS4b'-5b          | -3104.171401 | -3104.18635  | -3104.212954 | -3103.636575 | -3103.651524 | -3103.678128 |
| 5b                | -3104.202875 | -3104.216915 | -3104.245808 | -3103.668608 | -3103.682648 | -3103.711542 |
| 6b                | -2990.818793 | -2990.835085 | -2990.858024 | -2990.288407 | -2990.304699 | -2990.327638 |
| TS6b-7b           | -2990.786422 | -2990.80381  | -2990.82531  | -2990.255508 | -2990.272896 | -2990.294396 |

|            |              |              |              |              |              |              |
|------------|--------------|--------------|--------------|--------------|--------------|--------------|
| 7b         | -2990.785804 | -2990.80204  | -2990.825816 | -2990.255024 | -2990.271261 | -2990.295037 |
| TS7b-8b    | -2990.776621 | -2990.792344 | -2990.817661 | -2990.25005  | -2990.265772 | -2990.291089 |
| 8b         | -2990.797756 | -2990.813345 | -2990.839146 | -2990.265912 | -2990.281501 | -2990.307302 |
| 9b         | -2875.004799 | -2875.016633 | -2875.045464 | -2874.520934 | -2874.532767 | -2874.561598 |
| TS1-2c     | -3217.546511 | -3217.561455 | -3217.592786 | -3217.006406 | -3217.02135  | -3217.052681 |
| 2c         | -3217.580027 | -3217.595966 | -3217.627642 | -3217.041577 | -3217.057515 | -3217.089191 |
| 6c         | -1954.263658 | -1954.27902  | -1954.298064 | -1953.965185 | -1953.980548 | -1953.999591 |
| TS6c-7c    | -1954.257063 | -1954.272673 | -1954.288554 | -1953.958636 | -1953.974246 | -1953.990127 |
| 7c         | -1954.265317 | -1954.279304 | -1954.295065 | -1953.966547 | -1953.980533 | -1953.996295 |
| TS7c-8c    | -1954.221037 | -1954.233994 | -1954.252739 | -1953.926914 | -1953.939871 | -1953.958616 |
| 8c         | -1954.253601 | -1954.264741 | -1954.284376 | -1953.955749 | -1953.966888 | -1953.986524 |
| 5d         | -1144.493223 | -1144.4953   | -1144.518011 | -1144.417425 | -1144.419502 | -1144.442213 |
| TS5d-6d    | -1144.457923 | -1144.455237 | -1144.477712 | -1144.382108 | -1144.379421 | -1144.401897 |
| 6d         | -1144.484509 | -1144.479322 | -1144.503139 | -1144.408836 | -1144.403649 | -1144.427465 |
| TS6d-7d    | -1144.458205 | -1144.455539 | -1144.479186 | -1144.383941 | -1144.381276 | -1144.404923 |
| 7d         | -1144.456751 | -1144.454427 | -1144.478924 | -1144.383623 | -1144.381299 | -1144.405796 |
| TS7d-8d    | -1144.440722 | -1144.435487 | -1144.460199 | -1144.368755 | -1144.36352  | -1144.388232 |
| 8d         | -1144.497263 | -1144.487408 | -1144.511462 | -1144.425295 | -1144.415441 | -1144.439495 |
| 5e         | -1031.074686 | -1031.087539 | -1031.103391 | -1031.001381 | -1031.014234 | -1031.030086 |
| 6e         | -1031.105227 | -1031.108686 | -1031.125937 | -1031.0326   | -1031.036059 | -1031.05331  |
| TS6e-7e    | -1031.09436  | -1031.096622 | -1031.110664 | -1031.020633 | -1031.022896 | -1031.036938 |
| 7e         | -1031.095099 | -1031.096172 | -1031.111883 | -1031.022478 | -1031.023552 | -1031.039263 |
| TS7e-8e    | -1031.036847 | -1031.036349 | -1031.05242  | -1031.010244 | -1030.968975 | -1030.985046 |
| 8e         | -1031.077618 | -1031.081148 | -1031.099458 | -1031.008709 | -1031.012239 | -1031.030549 |
| 6f         | -917.6774244 | -917.6924607 | -917.6924607 | -917.6073244 | -917.6223607 | -917.6223607 |
| 6g         | -2875.423143 | -2875.46786  | -2875.508578 | -2874.927857 | -2874.972574 | -2875.013291 |
| Pd_1       | -4273.754605 | -4273.771938 | -4273.804088 | -4272.880946 | -4272.898279 | -4272.930429 |
| Pd_2       | -2200.668712 | -2200.678967 | -2200.700648 | -2200.258349 | -2200.268604 | -2200.290285 |
| Pd_3       | -2661.198721 | -2661.212059 | -2661.235511 | -2660.660606 | -2660.673944 | -2660.697396 |
| Pd_TS3-4   | -2661.188138 | -2661.203815 | -2661.228114 | -2660.652024 | -2660.667702 | -2660.692    |
| Pd_4       | -2661.208432 | -2661.224667 | -2661.24845  | -2660.672576 | -2660.688811 | -2660.712594 |
| Pd_4'      | -2661.214252 | -2661.229675 | -2661.253548 | -2660.679711 | -2660.695134 | -2660.719008 |
| Pd_4''     | -1624.676916 | -1624.684073 | -1624.705069 | -1624.371904 | -1624.379061 | -1624.400057 |
| Pd_TS4''-5 | -1624.643861 | -1624.650293 | -1624.670313 | -1624.341832 | -1624.348264 | -1624.368284 |
| Pd_5       | -1624.664978 | -1624.66907  | -1624.689664 | -1624.363269 | -1624.36736  | -1624.387954 |
| Pd_6       | -588.1290868 | -588.1228221 | -588.1383892 | -588.0538157 | -588.047551  | -588.0631181 |
| Pd_TS6-8   | -588.0980855 | -588.0908256 | -588.1066388 | -588.0269829 | -588.0197229 | -588.0355362 |
| Pd_8       | -588.1221798 | -588.1130032 | -588.1301152 | -588.0502063 | -588.0410297 | -588.0581417 |
| Pd_8'      | -1395.485308 | -1395.483547 | -1395.503128 | -1395.233532 | -1395.231771 | -1395.251352 |
| Pd_9       | -1277.520941 | -1277.517252 | -1277.536379 | -1277.338645 | -1277.334957 | -1277.354084 |
| Pd_10      | -3350.596519 | -3350.606511 | -3350.639653 | -3349.954637 | -3349.964629 | -3349.997771 |

## 5. References

1. Perdew, J.P.; Burke, K.; Ernzerhof, M. Generalized gradient approximation made simple. *Phys. Rev. Lett.* **1996**, *77*, 3865.
2. Perdew, J.P.; Burke, K.; Ernzerhof, M. Generalized gradient approximation made simple [phys. Rev. Lett. 77, 3865 (1996)]. *Phys. Rev. Lett.* **1997**, *78*, 1396-1396.
3. Becke, A.D. Density-functional thermochemistry. III. The role of exact exchange. *J. Chem. Phys.* **1993**, *98*, 5648-5652.
4. Zhao, Y.; Truhlar, D.G. Density functionals with broad applicability in chemistry. *Acc. Chem. Res.* **2008**, *41*, 157-167.
5. Zhao, Y.; Truhlar, D.G. A new local density functional for main-group thermochemistry, transition metal bonding, thermochemical kinetics, and noncovalent interactions. *J. Chem. Phys.* **2006**, *125*, 194101.
6. Zhao, Y.; Truhlar, D.G. Applications and validations of the Minnesota density functionals. *Chem. Phys. Lett.* **2011**, *502*, 1-13.
7. Grimme, S.; Ehrlich, S.; Goerigk, L. Effect of the damping function in dispersion corrected density functional theory. *J. Comput. Chem.* **2011**, *32*, 1456-1465.
8. Smith, D.G.; Burns, L.A.; Patkowski, K.; Sherrill, C.D. Revised damping parameters for the D3 dispersion correction to density functional theory. *J. Phys. Chem. Lett.* **2016**, *7*, 2197-2203.
